# Supplementary material for: Clinical outcome in patients with end-stage heart failure who underwent continuous-flow left ventricular assist devices in a single center
Source: PubMed Central journal article supplement — Korean J Intern Med. 2021 Dec 7;37(2):340–9. doi: 10.3904/kjim.2021.088 (PMC8925944; doi:10.3904/kjim.2021.088), 2021-12-07
Supplement: kjim-2021-088-suppl3.pdf [file kjim-2021-088-suppl3.pdf]

**Supplementary Table 3. Baseline characteristics by sex**

| Variable                           | Women (n = 12)         | Men (n = 38)         | p value |
|------------------------------------|------------------------|----------------------|---------|
| <b>Clinical</b>                    |                        |                      |         |
| Age, yr                            | 70.0 (60.5–77.0)       | 66.5 (57.8–73.0)     | 0.333   |
| Body mass index, kg/m <sup>2</sup> | 23.0 (21.7–24.3)       | 23.0 (20.9–24.9)     | 0.884   |
| Body surface area, m <sup>2</sup>  | 1.5 (1.4–1.6)          | 1.8 (1.7–1.9)        | < 0.001 |
| Severe diabetes mellitus           | 3 (25.0)               | 12 (31.5)            | 1.000   |
| Chronic renal disease              | 7 (58.3)               | 15 (39.4)            | 0.492   |
| Prior cardiac surgery              | 2 (16.6)               | 14 (36.8)            | 0.292   |
| Ischemic heart disease             | 6 (50.0)               | 22 (57.8)            | 0.631   |
| <b>INTERMACS profile</b>           |                        |                      |         |
| Critical cardiogenic shock         | 0                      | 2 (5.2)              | 1.000   |
| Progressive decline                | 4 (33.3)               | 11 (28.9)            | 1.000   |
| Stable but inotrope-dependent      | 8 (66.6)               | 22 (57.8)            | 0.740   |
| Resting symptoms                   | 0                      | 3 (7.8)              | 1.000   |
| LV ejection fraction               | 20.9 (14.7–27.2)       | 22.5 (19.2–26.0)     | 0.401   |
| > 50%                              | 0                      | 0                    | -       |
| 40%–49%                            | 0                      | 0                    | -       |
| 30%–39%                            | 2 (16.6)               | 5 (13.1)             | 1.000   |
| 20%–29%                            | 7 (58.3)               | 18 (47.3)            | 0.508   |
| < 20%                              | 3 (25.0)               | 15 (39.4)            | 0.497   |
| LV end-diastolic diameter, cm      | 6.6 (5.8–7.7)          | 6.9 (6.2–7.5)        | 0.417   |
| <b>NYHA class</b>                  |                        |                      |         |
| III                                | 3 (25.0)               | 4 (10.5)             | 0.337   |
| IV                                 | 9 (75.0)               | 34 (89.4)            | 0.337   |
| <b>Laboratory</b>                  |                        |                      |         |
| Hemoglobin, g/dL                   | 10.9 (9.6–12.4)        | 10.3 (9.2–12.8)      | 0.682   |
| White blood cell count, × 1,000/μL | 7.6 (6.7–8.5)          | 7.3 (5.5–9.1)        | 0.606   |
| Platelets, × 1,000/μL              | 197.5 (93.3–235.8)     | 145.0 (91.5–200.3)   | 0.499   |
| Blood urea nitrogen, mg/dL         | 17.3 (14.3–29.1)       | 24.1 (16.8–47.0)     | 0.180   |
| Creatinine, mg/dL                  | 1.1 (0.9–1.8)          | 1.4 (0.9–1.8)        | 0.683   |
| Albumin, g/dL                      | 3.6 (3.0–4.0)          | 3.5 (3.0–3.9)        | 0.977   |
| ALT, μ/L                           | 21.0 (15.8–27.5)       | 29.5 (16.8–77.3)     | 0.125   |
| AST, μ/L                           | 27.0 (20.3–29.8)       | 34.0 (21.8–74.5)     | 0.270   |
| Total bilirubin, mg/dL             | 1.5 (0.8–2.8)          | 1.5 (0.9–2.5)        | 0.820   |
| INR                                | 1.2 (1.1–1.5)          | 1.2 (1.1–1.4)        | 0.514   |
| Sodium, mmol/L                     | 130.5 (128.0–136.3)    | 135.0 (131.8–139.0)  | 0.040   |
| hsCRP, mg/L                        | 20.0 (2.8–42.1)        | 11.7 (4.5–34.2)      | 0.716   |
| NT-proBNP, pg/mL                   | 17,244 (11,755–35,000) | 7,563 (4,255–12,958) | 0.002   |
| <b>Preoperative</b>                |                        |                      |         |
| ECMO bridged                       | 1 (8.3)                | 10 (26.3)            | 0.257   |
| Dialysis                           | 3 (25.0)               | 12 (31.5)            | 1.000   |
| IABP                               | 0                      | 1 (2.6)              | 1.000   |
| Ventilator                         | 2 (16.6)               | 13 (34.2)            | 0.304   |

**Supplementary Table 3. Continued**

| Variable                     | Women (n = 12)   | Men (n = 38)     | p value |
|------------------------------|------------------|------------------|---------|
| <b>Hemodynamic</b>           |                  |                  |         |
| Mean RA pressure, mmHg       | 9.0 (4.0–15.0)   | 12.5 (8.0–16.5)  | 0.151   |
| Mean PA pressure, mmHg       | 38.0 (29.0–43.0) | 38.5 (31.8–43.3) | 0.384   |
| Mean PWP, mmHg               | 21.0 (16.0–29.0) | 27.0 (22.5–31.5) | 0.163   |
| Cardiac output, L/min        | 2.7 (2.5–3.4)    | 3.5 (2.8–4.2)    | 0.010   |
| <b>Medications</b>           |                  |                  |         |
| ARB or ARNI                  | 9 (75.0)         | 23 (60.5)        | 0.497   |
| ACE inhibitor                | 7 (58.3)         | 9 (23.6)         | 0.036   |
| Amiodarone                   | 4 (33.3)         | 25 (65.7)        | 0.047   |
| Beta blocker                 | 7 (58.3)         | 20 (52.6)        | 0.730   |
| Aldosterone antagonist       | 12 (100)         | 36 (94.7)        | 1.000   |
| Ivabradine                   | 4 (33.3)         | 8 (21.0)         | 0.448   |
| Loop diuretics               | 12 (100)         | 37 (97.3)        | 1.000   |
| Phosphodiesterase inhibitors | 7 (58.3)         | 16 (42.1)        | 0.325   |
| ICD                          | 3 (25.0)         | 10 (26.3)        | 1.000   |
| CRT                          | 4 (33.3)         | 5 (13.1)         | 0.191   |
| <b>Implant strategy</b>      |                  |                  |         |
| BTT/BTC                      | 6 (50.0)         | 24 (63.2)        | 0.506   |
| DT                           | 6 (50)           | 14 (36.8)        | 0.506   |
| <b>Device type</b>           |                  |                  |         |
| Heartmate II™                | 0                | 17 (44.7)        | 0.004   |
| HVAD™                        | 12 (100)         | 21 (55.2)        | 0.004   |

Values are presented as median (interquartile range) or number (%).

INTERMACS, Interagency Registry for Mechanically Assisted Circulatory Support; LV, left ventricle; NYHA, New York Heart Association; ALT, alanine aminotransferase; AST, aspartate aminotransferase; INR, international normalized ratio; hsCRP, high-sensitivity C-reactive protein; NT-proBNP, N-terminal-pro hormone B-type natriuretic peptide; ECMO, extracorporeal membrane oxygenation; IABP, intra-aortic balloon pump; RA, right atrium; PA, pulmonary artery; PWP, pulmonary wedge pressure; ARB, angiotensin II receptor blocker; ARNI, angiotensin receptor-neprilysin inhibitor; ACE, angiotensin-converting enzyme; ICD, implantable cardioverter-defibrillator; CRT, cardiac resynchronization therapy; BTT/BTC, bridge to transplantation/bridge to candidacy; DT, destination therapy; HVAD, HeartWare Ventricular Assist Device.
