# Supplementary material for: Clinical outcome in patients with end-stage heart failure who underwent continuous-flow left ventricular assist devices in a single center
Source: PubMed Central journal article supplement — Korean J Intern Med. 2021 Dec 7;37(2):340–9. doi: 10.3904/kjim.2021.088 (PMC8925944; doi:10.3904/kjim.2021.088), 2021-12-07
Supplement: kjim-2021-088-suppl8.pdf [file kjim-2021-088-suppl8.pdf]

**Supplementary Table 8. Clinical outcomes stratified by LVAD implantation periods**

| Variable                             | Pre-reimbursement period <sup>a</sup><br>(n = 23) | Post-reimbursement period <sup>a</sup><br>(n = 27) | p value |
|--------------------------------------|---------------------------------------------------|----------------------------------------------------|---------|
| All-cause mortality during follow-up | 7 (30.4)                                          | 4 (14.8)                                           | 0.184   |
| Stroke                               | 9 (39.1)                                          | 7 (25.9)                                           | 0.318   |
| Driveline infection                  | 6 (26.0)                                          | 3 (11.1)                                           | 0.270   |
| Gastrointestinal bleeding            | 8 (34.7)                                          | 5 (18.5)                                           | 0.191   |
| Major bleeding                       | 14 (60.8)                                         | 13 (48.1)                                          | 0.368   |
| Postop bleeding control surgery      | 4 (17.3)                                          | 3 (11.1)                                           | 0.689   |
| Device malfunction                   | 0                                                 | 1 (3.7)                                            | 1.000   |
| Postoperative RHF                    | 8 (34.7)                                          | 3 (11.1)                                           | 0.044   |
| Inotropic weaning failure            | 7 (30.4)                                          | 1 (3.7)                                            | 0.017   |
| Inotropic restart or multidrug       | 1 (4.3)                                           | 3 (11.1)                                           | 0.614   |
| RVAD insertion                       | 4 (17.3)                                          | 0                                                  | 0.038   |

Values are presented as number (%).

LVAD, left ventricular assist device; RHF, right heart failure; RVAD, right ventricular assist device.

<sup>a</sup>The national insurance commenced reimbursement for pre-approved cases since October, 2018.
